# Supplementary material
Source: publisher figshare collection journal article supplement (https://karger.figshare.com/ndownloader/files/17783906)
Supplement: Supplementary file 1 [file 17783906]

Table S1. The description of missing data

| Variables | Non-missing | Missing |
| --- | --- | --- |
| Age, y | 6776 | 0 |
| Race/ethnicity | 6776 | 0 |
| Education | 6765 | 11 |
| Smoking | 5811 | 965 |
| Physical Activity | 6361 | 415 |
| Poverty to income ratio | 6250 | 526 |
| BMI, kg/m2 | 6659 | 117 |
| SBP, mm Hg | 5925 | 851 |
| DBP, mm Hg | 5925 | 851 |
| Alcohol intake, gm | 6477 | 299 |
| Caffeine intake, mg | 6477 | 299 |
| Calcium intake, mg | 6477 | 299 |
| Carbohydrate intake, gm | 6477 | 299 |
| Cholesterol intake, mg | 6477 | 299 |
| Dietary fiber intake, gm | 6477 | 299 |
| Energy intake, kcal | 6477 | 299 |
| TMFA intake, gm | 6477 | 299 |
| TPFA intake, gm | 6477 | 299 |
| TSFA intake, gm | 6477 | 299 |
| Total fat intake, gm | 6477 | 299 |
| Protein intake, gm | 6477 | 299 |
| Albumin, g/dL | 6776 | 0 |
| ALT, U/L | 6776 | 0 |
| AST, U/L | 6776 | 0 |
| GGT, U/L | 6776 | 0 |
| FBG, mg/dL | 6776 | 0 |
| Total cholesterol, mg/dL | 6776 | 0 |
| Triglycerides, mg/dL | 6776 | 0 |
| Homocysteine, umol/L | 6523 | 253 |
| Serum folate, ng/mL | 6759 | 17 |

Abbreviations: BMI, body mass index; SBP, systolic blood pressure; DBP, diastolic blood pressure; TMFA, total monounsaturated fatty acids; TPFA, total polyunsaturated fatty acids; TSFA, total saturated fatty acids; ALT, alanine aminotransferase; AST, aspartate aminotransferase; GGT, gamma glutamyl transferase; FBG, fasting blood glucose.

Table S2. Sensitivity comparative analysis between pre-imputation and post-imputation

| Variables | Pre-imputation | Imputation 1 | Imputation 2 | Imputation 3 | Imputation 4 | Imputation 5 | *P* value |
| --- | --- | --- | --- | --- | --- | --- | --- |
| Education, % |  |  |  |  |  |  | 1.000 |
| < high school | 1883 (27.8) | 1889 (27.9) | 1888 (27.9) | 1890 (27.9) | 1889 (27.9) | 1889 (27.9) |  |
| High school | 1645 (24.3) | 1647 (24.3) | 1647 (24.3) | 1646 (24.3) | 1648 (24.3) | 1647 (24.3) |  |
| > high school | 3237 (47.9) | 3240 (47.8) | 3241 (47.8) | 3240 (47.8) | 3239 (47.8) | 3240 (47.8) |  |
| Smoking, % |  |  |  |  |  |  | 1.000 |
| Never | 3613 (62.2) | 4208 (62.1) | 4207 (62.1) | 4201 (62.0) | 4207 (62.1) | 4205 (62.1) |  |
| Former | 1092 (18.8) | 1274 (18.8) | 1275 (18.8) | 1275 (18.8) | 1274 (18.8) | 1276 (18.8) |  |
| Current | 1106 (19.0) | 1294 (19.1) | 1294 (19.1) | 1300 (19.2) | 1295 (19.1) | 1295 (19.1) |  |
| Physical Activity, % |  |  |  |  |  |  | 1.000 |
| Sedentary | 1449 (22.8) | 1539 (22.7) | 1540 (22.7) | 1537 (22.7) | 1547 (22.8) | 1544 (22.8) |  |
| Low | 1851 (29.1) | 1971 (29.1) | 1970 (29.1) | 1974 (29.1) | 1979 (29.2) | 1989 (29.4) |  |
| Moderate | 1213 (19.1) | 1292 (19.1) | 1292 (19.1) | 1298 (19.2) | 1280 (18.9) | 1283 (18.9) |  |
| High | 1848 (29.1) | 1974 (29.1) | 1974 (29.1) | 1967 (29.0) | 1970 (29.1) | 1960 (28.9) |  |
| Poverty to income ratio | 2.5 ± 1.7 | 2.5 ± 1.7 | 2.5 ± 1.7 | 2.5 ± 1.7 | 2.5 ± 1. | 2.5 ± 1.7 | 0.993 |
| BMI (kg/m2) | 27.4 ± 6.4 | 27.4 ± 6.4 | 27.4 ± 6.4 | 27.4 ± 6.4 | 27.4 ± 6.4 | 27.4 ± 6.4 | 1.000 |
| SBP (mm Hg) | 111.4 ± 11.0 | 111.6 ± 10.9 | 111.6 ± 11.0 | 111.6 ± 11.0 | 111.6 ± 11.0 | 111.5 ± 10.9 | 0.713 |
| DBP (mm Hg) | 65.7 ± 10.8 | 65.9 ± 10.8 | 65.8 ± 10.8 | 65.8 ± 10.8 | 65.8 ± 10.8 | 65.7 ± 10.8 | 0.992 |
| Alcohol intake (gm) | 4.4 ± 15.8 | 4.4 ± 16.3 | 4.4 ± 16.1 | 4.3 ± 15.9 | 4.3 ± 15.7 | 4.3 ± 16.0 | 0.999 |
| Caffeine intake (mg) | 119.2 ± 162.8 | 118.3 ± 161.8 | 118.7 ± 162.1 | 119.1 ± 161.7 | 118.7 ± 161.7 | 119.1 ± 161.7 | 1.000 |
| Calcium intake (mg) | 812.6 ± 509.7 | 812.7 ± 506.9 | 811.0 ± 506.9 | 811.1 ± 506.78 | 810.1 ± 507.5 | 810.2 ± 506.9 | 0.999 |
| Carbohydrate intake (gm) | 248.2 ± 109.0 | 248.2 ± 108.5 | 248.2 ± 108.5 | 247.8 ± 108.7 | 248.0 ± 109.7 | 247.8 ± 108.1 | 1.000 |
| Cholesterol intake (mg) | 250.5 ± 188.1 | 250.6 ± 189.0 | 250.9 ± 187.9 | 250.5 ± 187.0 | 250.0 ± 187.1 | 250.8 ± 186.7 | 1.000 |
| Dietary fiber intake (gm) | 14.5 ± 8.3 | 14.5 ± 8.3 | 14.5 ± 8.3 | 14.4 ± 8.3 | 14.5 ± 8.3 | 14.5 ± 8.3 | 0.999 |
| Energy intake, (kcal) | 1913.9 ± 774.4 | 1914.1 ± 764.4 | 1913.9 ± 764.4 | 1911.8 ± 763.5 | 1912.9 ± 770.8 | 1911.5 ± 762.9 | 1.000 |
| TMFA intake (gm) | 26.11 ± 14.0 | 26.1 ± 13.8 | 26.1 ± 13.8 | 26.1 ± 13.8 | 26.1 ± 13.8 | 26.1 ± 13.8 | 1.000 |
| TPFA intake (gm) | 15.0 ± 9.0 | 15.0 ± 9.0 | 115.0 ± 9.0 | 15.0 ± 8.9 | 15.0 ± 9.0 | 15.0 ± 9.0 | 1.000 |
| TSFA intake (gm) | 23.4 ± 13.2 | 23.4 ± 13.0 | 23.4 ± 13.0 | 23.5 ± 13.0 | 23.5 ± 13.0 | 23.4 ± 13.0 | 1.000 |
| Total fat intake (gm) | 70.7 ± 35.8 | 70.6 ± 35.3 | 70.6 ± 35.3 | 70.7 ± 35.3 | 70.7 ± 35.4 | 70.6 ± 35.3 | 1.000 |
| Protein intake (gm) | 70.8 ± 32.4 | 70.8 ± 32.9 | 70.8 ± 32.5 | 70.7 ± 32.2 | 70.7 ± 32.4 | 70.7 ± 32.3 | 1.000 |
| Homocysteine (umol/L) | 6.9 ± 3.5 | 6.9 ± 3.5 | 6.9 ± 3.5 | 6.9 ± 3.5 | 6.9 ± 3.5 | 6.9 ± 3.5 | 0.999 |
| Serum folate (ng/mL) | 14.3 ± 8.5 | 14.3 ± 8.5 | 14.3 ± 8.5 | 14.3 ± 8.5 | 14.3 ± 8.5 | 14.3 ± 8.5 | 1.000 |

Abbreviations: BMI, body mass index; SBP, systolic blood pressure; DBP, diastolic blood pressure; TMFA, total monounsaturated fatty acids; TPFA, total polyunsaturated fatty acids; TSFA, total saturated fatty acids.

Table S3. Association between SUA and CKD among pre- and post-imputation data

| SUA, mg/dL | CKD OR (95%CI), *P* value | | | | | | |
| --- | --- | --- | --- | --- | --- | --- | --- |
| Pre-imputation | Imputation 1 | Imputation 2 | Imputation 3 | Imputation 4 | Imputation 5 | Pooled by rubin’s rule |
| Model 2 |  |  |  |  |  |  |  |
| Continuous | 1.46 (1.32, 1.61) | 1.48 (1.36, 1.61) | 1.48 (1.36, 1.62) | 1.48 (1.36, 1.61) | 1.49 (1.36, 1.62) | 1.48 (1.36, 1.61) | 1.48 (1.43, 1.53) |
| Tertiles |  |  |  |  |  |  |  |
| T1 (< 4.5) | Reference | Reference | Reference | Reference | Reference | Reference | Reference |
| T2 (4.5-5.7) | 1.55 (1.21, 1.99) | 1.51 (1.21, 1.88) | 1.52 (1.22, 1.90) | 1.53 (1.22, 1.91) | 1.53 (1.23, 1.91) | 1.52 (1.22, 1.89) | 1.52 (1.39, 1.67) |
| T3 (≥ 5.7) | 3.77 (2.74, 5.19) | 3.47 (2.58, 4.68) | 3.60 (2.77, 4.67) | 3.65 (2.81, 4.75) | 3.62 (2.78, 4.70) | 3.67 (2.82, 4.77) | 3.61 (2.78, 4.69) |
| *P* for trend | <0.001 | <0.001 | <0.001 | <0.001 | <0.001 | <0.001 | <0.001 |
| Model 3 |  |  |  |  |  |  |  |
| Continuous | 1.39 (1.23, 1.58) <0.0001 | 1.43 (1.30, 1.57) <0.0001 | 1.43 (1.30, 1.57) <0.0001 | 1.43 (1.31, 1.57) <0.0001 | 1.44 (1.32, 1.58) <0.0001 | 1.43 (1.31, 1.57) <0.0001 | 1.43 (1.37, 1.48) <0.0001 |
| Tertiles |  |  |  |  |  |  |  |
| T1 (< 4.5) | Reference | Reference | Reference | Reference | Reference | Reference | Reference |
| T2 (4.5-5.7) | 1.37 (1.02, 1.84) | 1.48 (1.18, 1.86) | 1.49 (1.19, 1.86) | 1.51 (1.21, 1.90) | 1.51 (1.21, 1.90) | 1.50 (1.20, 1.88) | 1.48 (1.35, 1.63) |
| T3 (≥ 5.7) | 3.11 (2.14, 4.51) | 3.24 (2.45, 4.27) | 3.27 (2.48, 4.32) | 3.28 (2.48, 4.34) | 3.34 (2.52, 4.41) | 3.27 (2.48, 4.32) | 3.25 (2.89, 3.66) |
| *P* for trend | <0.001 | <0.001 | <0.001 | <0.001 | <0.001 | <0.001 | <0.001 |

Model 2 was adjusted for age, body mass index, ethnicity, education status, smoking, alcohol consumption, physical activity and poverty to income ratio.

Model 3 was adjusted for all covariables in model 2 plus adjusted for systolic blood pressure, diastolic blood pressure, caffeine intake, calcium intake, carbohydrate intake, cholesterol intake, dietary fiber intake, energy intake, total monounsaturated fatty acids intake, total polyunsaturated fatty acids intake, total saturated fatty acids intake, total fat intake, protein intake, albumin, alanine aminotransferase, aspartate aminotransferase, gamma glutamyl transferase, fasting blood glucose, total cholesterol, triglycerides, homocysteine and serum folate.

Abbreviations: SUA, serum uric acid; CKD, chronic kidney disease; OR, odds ratio; CI, confidence interval.

Table S4. Threshold effect analysis of SUA on CKD using two piecewise binary logistic regression models among pre- and pro-imputation data†

|  | Pre-imputation | Imputation 1 | Imputation 2 | Imputation 3 | Imputation 4 | Imputation 5 |
| --- | --- | --- | --- | --- | --- | --- |
| SUA, mg/dL¶ | 1.39 (1.23, 1.58) | 1.43 (1.30, 1.57) | 1.43 (1.30, 1.57) | 1.43 (1.31, 1.57) | 1.44 (1.32, 1.58) | 1.43 (1.31, 1.57) |
| Inflection point‡ | 4.5 | 4.5 | 4.5 | 4.5 | 4.5 | 4.5 |
| ≤ 4.5 | 0.84 (0.66, 1.08) | 0.94 (0.77, 1.14) | 0.95 (0.78, 1.16) | 0.95 (0.78, 1.16) | 0.95 (0.78, 1.16) | 0.95 (0.78, 1.15) |
| > 4.5 | 1.87 (1.56, 2.24) | 1.77 (1.55, 2.02) | 1.76 (1.54, 2.01) | 1.77 (1.55, 2.02) | 1.78 (1.56, 2.03) | 1.76 (1.55, 2.01) |
| P for log likelihood ratio | <0.001 | <0.001 | <0.001 | <0.001 | <0.001 | <0.001 |

¶ Fitting model by standard binary logistic regression

‡ Fitting model by two piecewise binary logistic regression

†All models adjusted the same covariates, including age, body mass index, ethnicity, education status, smoking, alcohol consumption, physical activity, poverty to income ratio, systolic blood pressure, diastolic blood pressure, caffeine intake, calcium intake, carbohydrate intake, cholesterol intake, dietary fiber intake, energy intake, total monounsaturated fatty acids intake, total polyunsaturated fatty acids intake, total saturated fatty acids intake, total fat intake, protein intake, albumin, alanine aminotransferase, aspartate aminotransferase, gamma glutamyl transferase, fasting blood glucose, total cholesterol, triglycerides, homocysteine and serum folate.

Abbreviations: SUA, serum uric acid; CKD, chronic kidney disease; OR, odds ratio; CI, confidence interval.

Table S5. Effect size of SUA on CKD in prespecified and exploratory subgroups in each subgroup

| Variables | N | Events (%) | Adjusted OR (95%CI)* | *P* for interaction |
| --- | --- | --- | --- | --- |
| **Age (years)** |  |  |  | 0.002 |
| 18-40 | 4247 | 196 (4.6) | 1.11 (0.88, 1.40), 0.381 |  |
| 40-60 | 1554 | 93 (6.0) | 1.22 (0.92, 1.63), 0.175 |  |
| > 60 | 975 | 272 (27.9) | 2.03 (1.43, 2.86), <0.001 |  |
| **Race/ethnicity** |  |  |  | 0.092 |
| Non-Hispanic White | 3179 | 328 (10.3) | 1.47 (1.23, 1.75), <0.001 |  |
| Non-Hispanic Black | 1244 | 81 (6.5) | 1.25 (0.89, 1.76), 0.201 |  |
| Mexican American | 1747 | 108 (6.2) | 1.10 (0.81, 1.51), 0.535 |  |
| Other Hispanic | 328 | 24 (7.3) | 1.08 (0.73, 1.59), 0.704 |  |
| Other race | 278 | 20 (7.2) | 1.55 (0.54, 4.42), 0.415 |  |
| **Education** |  |  |  | 0.915 |
| < high school | 1883 | 184 (9.8) | 1.56 (1.23, 1.98), <0.001 |  |
| High school | 1645 | 163 (9.9) | 1.50 (1.17, 1.93), 0.002 |  |
| > high school | 3237 | 212 (6.5) | 1.25 (1.01, 1.54), 0.039 |  |
| **Smoking status** |  |  |  | 0.009 |
| Never | 3613 | 302 (8.4) | 1.52 (1.25, 1.86), <0.001 |  |
| Former | 1092 | 109 (10.0) | 1.56 (1.07, 2.28), 0.020 |  |
| Current | 1106 | 84 (7.6) | 1.08 (0.80, 1.47), 0.609 |  |
| **Physical Activity** |  |  |  | 0.052 |
| Sedentary | 1449 | 173 (11.9) | 1.62 (1.26, 2.07), <0.001 |  |
| Low | 1851 | 151 (8.2) | 1.46 (1.12, 1.89), 0.004 |  |
| Moderate | 1213 | 73 (6.0) | 0.90 (0.58, 1.42), 0.661 |  |
| High | 1848 | 139 (7.5) | 1.13 (0.87, 1.46), 0.361 |  |
| **BMI (kg/m2)** |  |  |  | 0.716 |
| < 18.5 | 189 | 30 (15.9) | 1.21 (1.05, 1.43), 0.030 |  |
| 18.5-25.0 | 2583 | 227 (8.8) | 1.23 (1.01, 1.51), 0.043 |  |
| 25.0-30 | 1991 | 160 (8.0) | 1.44 (1.14, 1.83), 0.002 |  |
| ≥ 30 | 1896 | 122 (6.4) | 1.57 (1.20, 2.05), 0.001 |  |
| **SBP (mm Hg) Tertile** |  |  |  | **0.265** |
| **T1 (≤107)** | **2224** | **102 (4.6)** | **1.43 (1.11, 1.85), 0.006** |  |
| **T2 (107-118)** | **2214** | **123 (5.6)** | **1.08 (0.86, 1.35), 0.510** |  |
| **T3 (>118)** | **1487** | **152 (10.2)** | **1.62 (1.29, 2.03), <0.001** |  |
| **DBP (mm Hg) Tertile** |  |  |  | **0.322** |
| **T1 (<60)** | **1474** | **89 (6.0)** | **0.95 (0.67, 1.33) 0.759** |  |
| **T2 (60-70)** | **2369** | **162 (6.8)** | **1.44 (1.19, 1.75), <0.001** |  |
| **T3 (>70)** | **2082** | **126 (6.1)** | **1.39 (1.12, 1.74), 0.003** |  |
| **FBG (mg/dL) Tertile** |  |  |  | **0.038** |
| **T1 (<85)** | **3122** | **183 (5.9)** | **1.16 (0.94, 1.43), 0.172** |  |
| **T2 (85-92)** | **2128** | **177 (8.3)** | **1.38 (1.10, 1.72), 0.005** |  |
| **T3 (>92)** | **1526** | **201 (13.2)** | **1.84 (1.37, 2.48), <0.001** |  |
| **Total cholesterol (mg/dL) Tertile** |  |  |  | **0.070** |
| **T1 (<164)** | **1438** | **95 (6.6)** | **1.27 (0.92, 1.74), 0.141** |  |
| **T2 (164-198)** | **2233** | **165 (7.4)** | **1.41 (1.11, 1.79), 0.005** |  |
| **T3 (>198)** | **3105** | **301 (9.7)** | **1.45 (1.21, 1.74), <0.001** |  |
| **Triglycerides (mg/dL) Tertile** |  |  |  | **0.052** |
| **T1 (<77)** | **2266** | **140 (6.2)** | **1.02 (0.77, 1.36), 0.888** |  |
| **T2 (77-132)** | **2366** | **208 (8.8)** | **1.52 (1.23, 1.88), <0.001** |  |
| **T3 (>132)** | **2144** | **213 (9.9)** | **1.43 (1.16, 1.77), <0.001** |  |
| **Homocysteine (umol/L) Tertile** |  |  |  | **0.222** |
| **T1 (<5.7)** | **2266** | **79 (3.5)** | **1.04 (0.76, 1.42), 0.830** |  |
| **T2 (5.7-8.1)** | **2741** | **177 (6.5)** | **1.25 (1.00, 1.55), 0.047** |  |
| **T3 (>8.1)** | **1516** | **303 (20.0)** | **1.50 (1.22, 1.84), <0.001** |  |

Abbreviations: BMI, body mass index; SBP, systolic blood pressure; DBP, diastolic blood pressure; FBG, fasting blood glucose; SUA, serum uric acid; CKD, chronic kidney disease; OR, odds ratio; CI, confidence interval.

*Adjusted for age, body mass index, ethnicity, education status, smoking, alcohol consumption, physical activity and poverty to income ratio, systolic blood pressure, diastolic blood pressure, caffeine intake, calcium intake, carbohydrate intake, cholesterol intake, dietary fiber intake, energy intake, total monounsaturated fatty acids intake, total polyunsaturated fatty acids intake, total saturated fatty acids intake, total fat intake, protein intake, albumin, alanine aminotransferase, aspartate aminotransferase, gamma glutamyl transferase, fasting blood glucose, total cholesterol, triglycerides, homocysteine, serum folate, if not be stratified.
